# Supplementary material
Source: publisher figshare collection journal article supplement (https://sage.figshare.com/ndownloader/files/14606045)
Supplement: Supplementary file 1 [file 14606045]

## Supplemental Material

**Table 1: Physiotherapy evidence database (PEDro) scores of included studies**

| Study, Year of Publication  | PEDro scale items <sup>a</sup> |   |   |   |   |   |   |   |   |    |    | PEDro score (0–10) |
|-----------------------------|--------------------------------|---|---|---|---|---|---|---|---|----|----|--------------------|
|                             | 1 <sup>b</sup>                 | 2 | 3 | 4 | 5 | 6 | 7 | 8 | 9 | 10 | 11 |                    |
| Wang, 2012 <sup>17</sup>    | +                              | + | + | + | + | – | + | + | – | +  | +  | 8                  |
| Chieffo, 2014 <sup>11</sup> | +                              | + | + | + | + | + | + | + | + | +  | +  | 10                 |
| Kim, 2014 <sup>12</sup>     | +                              | + | + | + | + | – | + | – | + | +  | +  | 8                  |
| Lin, 2015 <sup>13</sup>     | +                              | + | – | + | + | – | + | + | + | +  | +  | 8                  |
| Sasaki, 2016 <sup>1</sup>   | +                              | – | – | + | + | – | + | + | + | +  | +  | 7                  |
| Gu, 2016 <sup>9</sup>       | +                              | – | – | + | + | – | + | + | + | +  | +  | 7                  |
| Cha, 2017 <sup>15</sup>     | +                              | + | + | + | – | – | + | + | + | +  | +  | 8                  |
| Wang, 2018 <sup>19</sup>    | +                              | + | – | + | + | – | + | + | + | +  | +  | 8                  |

<sup>a</sup>1. eligibility criteria and source of participants; 2. random allocation; 3. concealed allocation; 4. baseline comparability; 5. blinded participants; 6. blinded therapists; 7. blinded assessors; 8. adequate follow-up; 9. intention-to-treat analysis; 10. between-group comparisons; 11. point estimates and variability; <sup>b</sup>Item 1 did not contribute to the total score.

High quality, PEDro score 6–10; fair quality, PEDro score 4–5; poor quality, PEDro score ≤ 3.

| Table 2. The subgroup analysis of mean post-stroke time and stimulation mode                                                                |         |              |                                              |                    |                       |
|---------------------------------------------------------------------------------------------------------------------------------------------|---------|--------------|----------------------------------------------|--------------------|-----------------------|
| Subgroup                                                                                                                                    | Studies | Participants | Mean Difference<br>[95% confidence interval] | <i>P</i>           | <i>I</i> <sup>2</sup> |
| 1. Body function – mean post-stroke time                                                                                                    |         |              |                                              |                    |                       |
| ≥6 months                                                                                                                                   | 4       | 71           | 0.69 [0.20–1.18] <sup>a</sup>                | 0.005 <sup>b</sup> | 0%                    |
| <6 months                                                                                                                                   | 3       | 72           | 0.64 [0.12–1.16] <sup>a</sup>                | 0.02 <sup>b</sup>  | 13%                   |
| Subgroup difference                                                                                                                         |         |              |                                              | 0.89 <sup>c</sup>  | 0%                    |
| 2. Body function – stimulation mode                                                                                                         |         |              |                                              |                    |                       |
| Excitation (≥5 Hz)                                                                                                                          | 5       | 88           | 0.70 [0.26–1.14] <sup>a</sup>                | 0.002 <sup>b</sup> | 0%                    |
| Suppression (≤1 Hz)                                                                                                                         | 2       | 55           | 0.61 [-0.07–1.29]                            | 0.08 <sup>b</sup>  | 34%                   |
| Subgroup difference                                                                                                                         |         |              |                                              | 0.83 <sup>c</sup>  | 0%                    |
| 3. Activities and participation – mean post-stroke time                                                                                     |         |              |                                              |                    |                       |
| ≥6 months                                                                                                                                   | 3       | 62           | 0.88 [0.24–1.53] <sup>a</sup>                | 0.007 <sup>b</sup> | 28%                   |
| <6 months                                                                                                                                   | 3       | 73           | 0.46 [-0.19–1.12]                            | 0.17 <sup>b</sup>  | 43%                   |
| Subgroup difference                                                                                                                         |         |              |                                              | 0.37 <sup>c</sup>  | 0%                    |
| 4. Activities and participation – stimulation mode                                                                                          |         |              |                                              |                    |                       |
| Excitation (≥5 Hz)                                                                                                                          | 4       | 79           | 0.75 [0.29–1.22] <sup>a</sup>                | 0.002 <sup>b</sup> | 0%                    |
| Suppression (≤1 Hz)                                                                                                                         | 2       | 56           | 0.49 [-0.72–1.70]                            | 0.43 <sup>b</sup>  | 78%                   |
| Subgroup difference                                                                                                                         |         |              |                                              | 0.69 <sup>c</sup>  | 0%                    |
| <sup>a</sup> indicates a significant difference in the comparison between rTMS and placebo groups in the equivalent <i>z</i> test           |         |              |                                              |                    |                       |
| <sup>b</sup> indicates <i>P</i> value of the equivalent <i>z</i> test, which is the result of meta-analysis between rTMS and placebo groups |         |              |                                              |                    |                       |
| <sup>c</sup> indicates <i>P</i> value of Cochran’s <i>Q</i> test, which is the result of subgroup analysis between these subgroups          |         |              |                                              |                    |                       |

## Appendix 1. Search strategy

|     |                                                           |
|-----|-----------------------------------------------------------|
| #1  | stroke                                                    |
| #2  | cerebrovascular                                           |
| #3  | CVA                                                       |
| #4  | cerebral and infarction                                   |
| #5  | cerebral and hemorrhag*                                   |
| #6  | brain and infarction                                      |
| #7  | brain and hemorrhag*                                      |
| #8  | ICH                                                       |
| #9  | intracranial and hemorrhag*                               |
| #10 | stroke[MeSH]                                              |
| #11 | #1 OR #2 OR #3 OR #4 OR #5 OR #6 OR #7 OR #8 OR #9 OR #10 |
| #12 | lower limb                                                |
| #13 | lower limbs                                               |
| #14 | lower extremit*                                           |
| #15 | hip or hips                                               |
| #16 | thigh or thighs                                           |
| #17 | knee or knees                                             |
| #18 | leg or legs                                               |
| #19 | ankle or ankles                                           |

|          |                                                                                                        |
|----------|--------------------------------------------------------------------------------------------------------|
| #20      | foot or feet                                                                                           |
| #21      | ambula*                                                                                                |
| #22      | walk or walking                                                                                        |
| #23      | gait                                                                                                   |
| #24      | #12 OR #13 OR #14 OR #15 OR #16 OR #17 OR #18 OR #19 OR #20 OR #21 OR #22 OR #23                       |
| #25      | rTMS                                                                                                   |
| #26      | "repetitive transcranial magnetic stimulation"                                                         |
| #27      | #25 OR #26                                                                                             |
| #28      | #11 AND #24 AND #27                                                                                    |
| Filters: | Pubmed: Randomized Controlled Trial<br>Cochrane Library: Trials<br>Embase: Randomized Controlled Trial |
